# Supplementary material for: Assessing the impact of a health intervention via user-generated Internet content
Source: Springer Nature journal article supplement (doi:10.1007/s10618-015-0427-9), 2015-07-01
Supplement: 10618_2015_427_MOESM1_ESM.pdf [file 10618_2015_427_MOESM1_ESM.pdf]

## Supplementary Material for “Assessing the Impact of a Health Intervention via User-generated Internet Content”

Vasileios Lampos<sup>1,\*</sup>, Elad Yom-Tov<sup>2</sup>,  
Richard Pebody<sup>3</sup>, Ingemar J. Cox<sup>1,4</sup>

<sup>1</sup>Department of Computer Science, University College London, UK

<sup>2</sup>Microsoft Research, US

<sup>3</sup>Public Health England, UK

<sup>4</sup>Department of Computer Science, University of Copenhagen, Denmark

\*Corresponding author (v.lampos@ucl.ac.uk)

**Table S1** The list of the 205 *n*-grams used as features in our predictive models for ILI rates. The initial, manually compiled 36 *n*-grams are denoted using bold font weight.

---

**1-grams:** #chills, #cough, #disease, #dizzy, #doctor, #fatigue, #fever, #flu, #gp, #headache, #illness, #infected, #infection, #medicine, #nausea, #shiver, #shivering, #sneeze, #unwell, #vomit, **chills, cough, coughed, coughing, diarrhoea, disease, dizzy, doctor, fatigue, fatigued, fever, flu, gp, hay-fever, headache, illness, infected, infection, influenza, man-flu, medicine, nausea, shiver, shivering, sneeze, sneezed, sneezing, thermometer, tonsil, tonsils, unwell, vomit, vomited, vomiting**

---

**2-grams:** annoying cough, awful headache, bad cough, bad headache, banging headache, bed flu, bed headache, biggest headache, **blocked nose, body ache, body aches**, chest infection, chesty cough, cold cough, cold flu, constant headache, cough cough, cough fuck, cough medicine, cough sneeze, cough sore, cough syrup, cough worse, coughing blood, coughing guts, coughing lungs, coughing sneezing, day doctor, day headache, disease nation, doctor cure, doctor experience, doctor today, doctor told, dying flu, ear infection, eye infection, feel dizzy, feel sick, feel unwell, feeling dizzy, feeling sick, feeling unwell, fever pitch, flu feel, flu jab, flu tablets, fucking headache, gonna vomit, good doctor, hate flu, hate unwell, hay fever, headache coming, headache days, headache feel, headache feeling, headache fuck, headache good, headache hell, headache hours, headache morning, headache night, headache sleep, headache sore, headache time, headache today, headache work, headache worse, heart disease, horrible disease, horrible headache, infected restless, kidney infection, killer headache, love doctor, love sneezing, major headache, man flu, massive headache, mental illness, **muscles ache**, new doctor, night coughing, night fever, people cough, pounding headache, rare disease, rid headache, runny nose, shiver spine, sick dizzy, sick headache, sleep coughing, sneeze sneeze, sneezing fit, sore throat, splitting headache, start fever, stomach ache, stuffy nose, stupid cough, swine flu, taste medicine, terminal illness, throat cough, throat headache, throat infection, tickly cough, tired headache, viral infection, waiting doctor, waking headache, wanna vomit, watch doctor, watching doctor, wine headache, woke headache, worst cough, worst headache

---

**3-grams:** blocked nose sore, cold flu tablets, cold sore throat, cough cough cough, day feel sick, eat feel sick, feel sick eating, feel sick feel, feel sick stomach, feel sore throat, food feel sick, hate feeling sick, headache feel sick, headache sore throat, hungry feel sick, literally feel sick, nose sore throat, risk heart disease, sleep feel sick, sore throat blocked, sore throat coming, sore throat cough, throat blocked nose, tired feel sick, today feel sick, woke sore throat, worlds worst headache, worst sore throat, worst stomach ache

---

**4-grams:** blocked nose sore throat, cough cough cough cough

---
